# Supplementary material for: Spermidine induces cytoprotective autophagy of female germline stem cells in vitro and ameliorates aging caused by oxidative stress through upregulated sequestosome-1/p62 expression
Source: PubMed Central journal article supplement (PMC8186080; doi:10.1186/s13578-021-00614-4), 2021-06-07
Supplement: 13578_2021_614_MOESM1_ESM.pdf [file 13578_2021_614_MOESM1_ESM.pdf]

## Additional file 1

**Table S1. p62 shRNA sequences**

| <b>No.</b> | <b>Sequences 5' to 3'</b> |
|------------|---------------------------|
| p62 shRNA1 | GCTGAAACATGGACACTTTGG     |
| p62 shRNA2 | GCTCCTACAGACCAAGAATTA     |
| p62 shRNA3 | GCAGTGTGTGCCCAGACTACG     |
| Con shRNA  | TTCTCCGAACGTGTCACGT       |

**Table S2. Sequence of primers used in this study**

| <b>Gene</b>   | <b>PCR primer<sup>a</sup></b>                           | <b>Product size</b> |
|---------------|---------------------------------------------------------|---------------------|
|               | qRT-PCR                                                 |                     |
| <i>Akt3</i>   | F: TGGGTTTCAGAAGAGGGGAGAA<br>R: AGGGGATAAGGTAAGTCCACATC | 122bp               |
| <i>Tcl1b1</i> | F: CACTTCCAGTCTACCTGGTCT<br>R: GGACAGTTACATGGGTTCTCCT   | 132bp               |
| <i>Col4a4</i> | F: GCCTGGTGTCTCGGGATCAAAG<br>R: AGCTGGAGTCAACAAAATGCC   | 211bp               |
| <i>Lpar3</i>  | F: CAAGCGCATGGACTTTTTCTAC<br>R: GAAATCCGCAGCAGCTAAGTT   | 211bp               |
| <i>Gapdh</i>  | F: TGGATTTGGACGCATTGGTC<br>R: TTTGCACTGGTACGTGTTGAT     | 211bp               |

a. F, forward; R, reverse.

**Table S3 Sequence of primers used in RT-PCR**

| <b>Gene</b>   | <b>PCR primer<sup>a</sup></b>                           | <b>Product size</b> |
|---------------|---------------------------------------------------------|---------------------|
| <i>Mvh</i>    | F: GGAAACCAGCAGCAAGTGAT<br>R: TGGAGTCCTCATCCTCTGG       | 213bp               |
| <i>Oct4</i>   | F: CTCGAACCACATCCTTCTCT<br>R: GGC GTTCTCTTTGGAAAGGTGTTC | 334bp               |
| <i>Dazl</i>   | F: GTGTGTCGAAGGGCTATGGAT<br>R: ACAGGCAGCTGATATCCAGTG    | 328bp               |
| <i>Stella</i> | F: CCCAATGAAGGACCCTGAAAC<br>R: AATGGCTCACTGTCCCGTTCA    | 354bp               |
| <i>Gapdh</i>  | F: GTCCCGTAGACAAAATGGTGA<br>R: TGCATTGCTGACAATCTTGAG    | 458bp               |

b. F, forward; R, reverse.

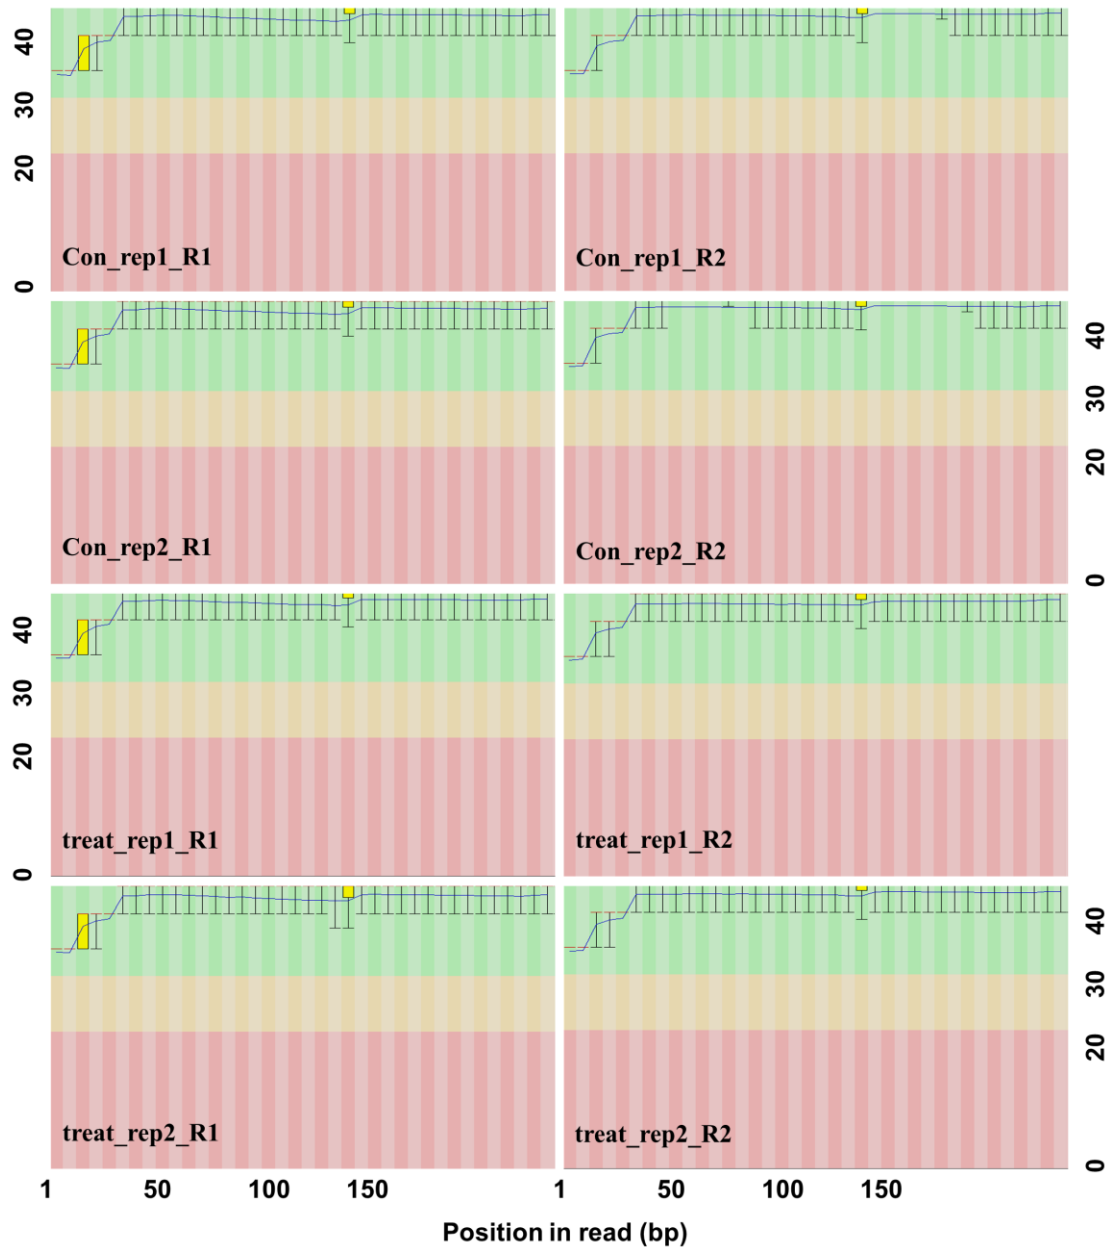

**Figure S1. Quality control of RNA-seq.** FastQC data showing the position-specific sequencing quality in each replicated group. Data filtering criterion was a Q-score > 10 (error rate < 10%). Con: untreated FGSCs. treat: SPD-treated FGSCs.

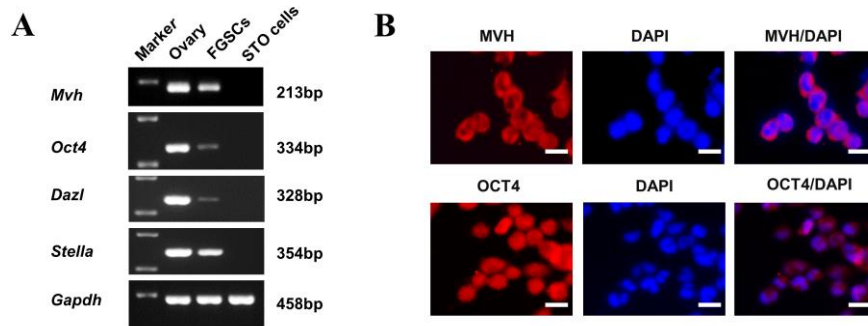

**Figure S2. Characteristics of FGSCs.** (A) The mRNA expression of FGSCs markers were detected by RT-PCR. STO is negative control. Ovary from adult mice was used as a positive control. Glyceraldehyde 3-phosphate dehydrogenase (*Gapdh*) expression was used as an internal control. *Mvh*, 213 bp; *Oct4*, 334 bp; *Dazl*, 328 bp; *Stella*, 354 bp; *Gapdh*, 458 bp. (B) Immunofluorescence staining of MVH and OCT4 in FGSCs (scale bars: 20  $\mu$ m).

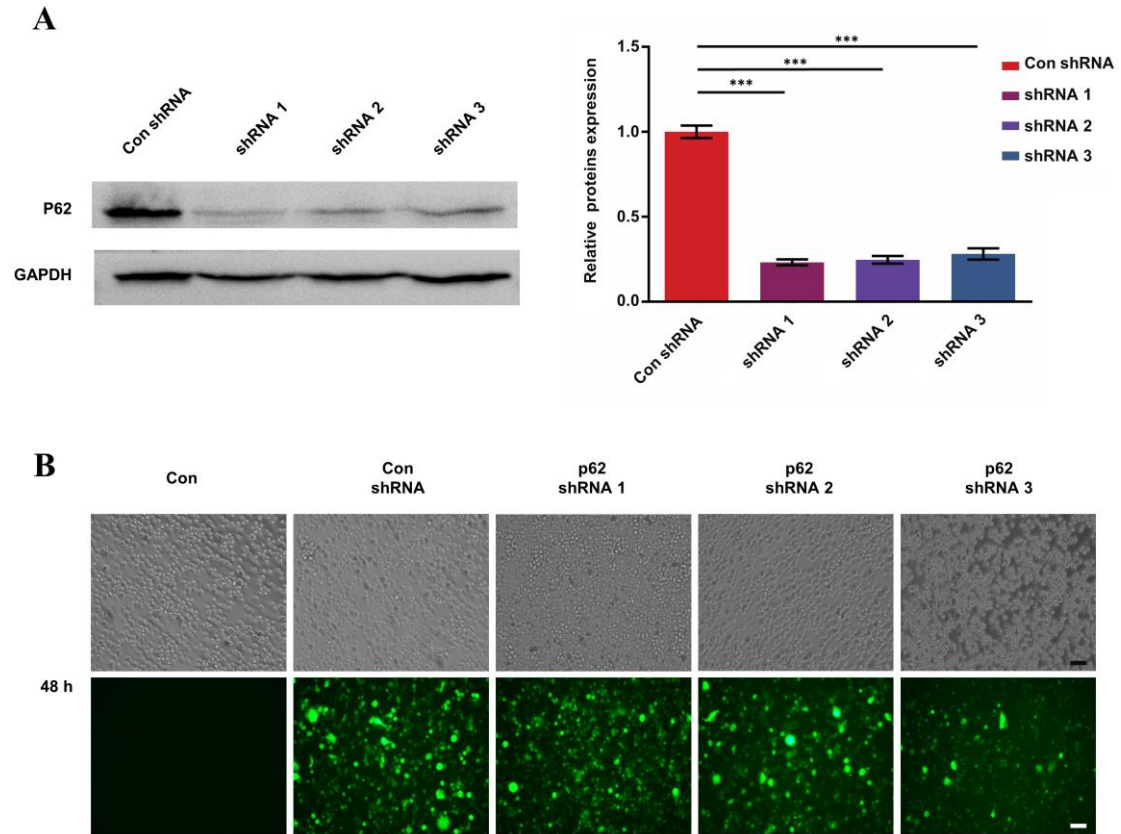

**Figure S3. Verification of p62-knockdown efficiency.** (A) Western blotting was performed to validate knockdown efficiency of three shRNA lentiviruses. All data are expressed as the mean  $\pm$  SEM of values from experiments performed at least in triplicate. \*\*\* $P < 0.001$  compared with controls. (B) Fluorescence microscopy was used to determine the infection efficiency of three shRNA lentiviruses. Con: control.
